# Supplementary material for: Effects of an Unripe Avocado Extract on Glycaemic Control in Individuals with Obesity: A Double-Blinded, Parallel, Randomised Clinical Trial
Source: MDPI journal article supplement (doi:10.3390/nu15224812), 2023-11-17
Supplement: s1 [file s1]

**Supplementary Table S1.** Dietary assessment at 1-week before and 11-week after the avocado extract or placebo intervention in adults with obesity<sup>1</sup>

|                                    | Avocado extract group (n=25) |             | Placebo group (n=25) |              |                            |
|------------------------------------|------------------------------|-------------|----------------------|--------------|----------------------------|
|                                    | W-1 to 0                     | W 11 to 12  | W-1 to 0             | W11 to 12    | p Value<br>(Between group) |
| <b>Diet intake</b>                 |                              |             |                      |              |                            |
| Energy intake (kj)                 | 9025 ± 620                   | 8382 ± 432  | 8556 ± 462           | 8832 ± 5.83  | 0.231                      |
| Carbohydrates (g)                  | 227 ± 15                     | 213 ± 14    | 218 ± 15.2           | 226± 18      | 0.203                      |
| Protein (g)                        | 91.7 ± 6.0                   | 87 ± 5.1    | 89.7 ± 5.27          | 95.1± 5.56   | 0.420                      |
| Total fat (g)                      | 88.0 ± 8.0                   | 81.7 ± 4.8  | 82.3 ± 5.25          | 82.9± 6.58   | 0.690                      |
| Saturated fat (g)                  | 34.2 ± 3.5                   | 29.5 ± 1.95 | 31.4 ± 2.12          | 30.6 ± 2.71  | 0.346                      |
| Trans fats (g)                     | 1.49 ± 0.176                 | 1.21± 1.08  | 1.29 ± 0.145         | 1.21 ± 0.139 | 0.510                      |
| Polyunsaturated fats (g)           | 12.1 ± 1.19                  | 12.2 ± 1.35 | 11.1 ± 0.875         | 12.5 ± 1.34  | 0.851                      |
| Monounsaturated fats (g)           | 29.6 ± 3.22                  | 27.9 ± 2.17 | 27.4 ± 2.21          | 28.1 ± 2.52  | 0.745                      |
| Fibre (g)                          | 22.5 ± 1.56                  | 21.7 ± 1.32 | 21.5 ± 1.58          | 24.3 ± 2.97  | 0.454                      |
| <b>Sleep and physical activity</b> |                              |             |                      |              |                            |
| Total sleep time (hours)           | 7.96 ± 0.23                  | 7.91 ± 0.18 | 8.39 ± 0.22          | 8.43 ± 0.22  | 0.712                      |
| Steps/day                          | 7920 ± 659                   | 7842 ± 789  | 7221 ± 922           | 7262 ± 729   | 0.944                      |

<sup>1</sup> Data are presented as mean ± SEM. AvX, Avocado extract group. Between-group analysis for the change from Week 0 to Week 12 for each variable was performed using one-way ANCOVA, adjusted for baseline value and sex.

**Figure S1**

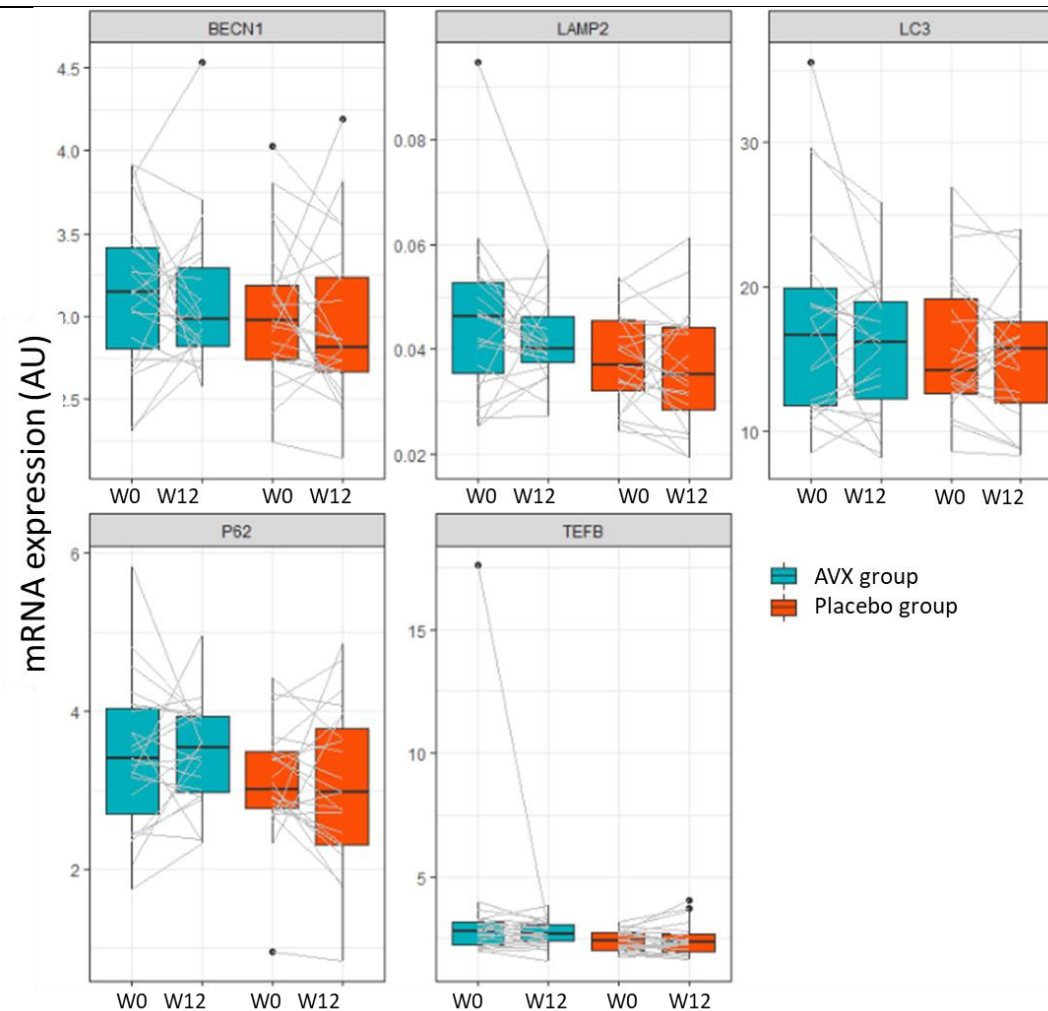

**Figure S1** Autophagy genes expression before and after the 12-wk avocado extract (AvX) or placebo intervention in adults with obesity. Data are means  $\pm$  SEMs;  $n = 23$  and  $23$  for AvX and Placebo groups, respectively. Between-group analysis for the change from Week 0 to Week 12 for each variable was performed using one-way ANCOVA, adjusted for baseline value and sex.
